# Supplementary material
Source: PubMed Central journal article supplement (PMC6942151)
Supplement: sbz093_suppl_supplementary_information.pdf [file sbz093_suppl_supplementary_information.pdf]

**Supplementary Material:**

**5 Supplementary Tables and 10 Supplementary References**

**EDITORIAL**

**Data from the World Health Organization's pharmacovigilance database supports the prominent role of pneumonia in mortality associated with clozapine adverse drug reactions**

Jose de Leon, Emilio J Sanz, Carlos De las Cuevas

Supplementary Table S1. First two findings: association between clozapine and pneumonia compared with other antipsychotics

| STUDIES                                                                                               | Pneumonia                         |                                                                      | Statistical analyses                                                                                                                           | Comment                                                             |
|-------------------------------------------------------------------------------------------------------|-----------------------------------|----------------------------------------------------------------------|------------------------------------------------------------------------------------------------------------------------------------------------|---------------------------------------------------------------------|
|                                                                                                       | Clozapine                         | Controls                                                             |                                                                                                                                                |                                                                     |
| <b>Clozapine may be associated with a greater number of pneumonia cases than other antipsychotics</b> |                                   |                                                                      |                                                                                                                                                |                                                                     |
| <b>TAIWAN REGISTRY</b>                                                                                |                                   |                                                                      |                                                                                                                                                |                                                                     |
| Kuo et al. <sup>S1</sup>                                                                              | 19%<br>(336/1739)                 | 7% schizophrenia<br>(510/6949)                                       | RR=3.18 (CI 2.62-3.86)                                                                                                                         | 2000 to 2008                                                        |
| Yang et al. <sup>S2</sup>                                                                             | 8%<br>(45/571)                    | 2% bipolar<br>(51/2277)                                              | RR=2.59 (CI 1.46-4.63)                                                                                                                         | 1998 to 2006                                                        |
|                                                                                                       |                                   | 10% OLA<br>(59/571)                                                  | RR=2.97 (CI 1.90-4.66) <sup>a</sup>                                                                                                            |                                                                     |
| Hung et al. <sup>S3</sup>                                                                             | 20% recurrent<br>(96/487)         | 16% single episode<br>(226/1438)                                     | RR=1.40 (CI 1.05-1.88)                                                                                                                         | For recurrent pneumonia<br>May overlap with Kuo et al <sup>S1</sup> |
| Kuo et al. <sup>S4</sup>                                                                              | Second rank predictor             |                                                                      | Machine learning                                                                                                                               | 185 schizophrenia inpatients                                        |
| Wu et al. <sup>S5</sup>                                                                               | 2.98 cases<br>per 100 person-year | 1.12 cases schizophrenia<br>per 100 person-year                      |                                                                                                                                                | 1998 to 2012<br>May overlap with Kuo et al <sup>S1</sup>            |
| <b>25-MONTH RETROSPECTIVE STUDY IN US COUNTY HOSPITAL</b>                                             |                                   |                                                                      |                                                                                                                                                |                                                                     |
| Stoecker et al. <sup>S6</sup>                                                                         | 34% (54/155)                      | 12% (18/155) general population<br>14% (22/155) RIS                  | OR=4.07 (CI 2.25-7.36)<br>OR=1.26 (CI 0.65-2.45;p=0.50) <sup>a</sup>                                                                           |                                                                     |
| <b>VIGIBASE (&gt;20,000,000 ADRs collected since 1968)</b>                                            |                                   |                                                                      |                                                                                                                                                |                                                                     |
| de Leon et al. <sup>4</sup>                                                                           | 4865                              | 393 RIS<br>622 QUE<br>493 OLA                                        | >1195 expected <sup>b</sup> (p<.001) <sup>c</sup><br>< 845 expected <sup>b</sup><br>< 650 expected <sup>b</sup><br>< 529 expected <sup>b</sup> | pneumonia on April 8, 2019                                          |
| <b>Clozapine may be associated with greater mortality during pneumonia than other antipsychotics</b>  |                                   |                                                                      |                                                                                                                                                |                                                                     |
| <b>PNEUMONIA DEATHS IN BRITISH STUDY FOCUSED ON DRUG DISCONTINUATION</b>                              |                                   |                                                                      |                                                                                                                                                |                                                                     |
| Taylor et al. <sup>S7</sup>                                                                           | 5 (1% of 529)                     | 0 (in 250) LAI RIS                                                   |                                                                                                                                                |                                                                     |
| <b>PNEUMONIA FATAL OUTCOMES IN VIGIBASE (&gt;140,000 clozapine ADRs collected since 1968)</b>         |                                   |                                                                      |                                                                                                                                                |                                                                     |
| de Leon et al. <sup>4</sup>                                                                           | 1,577 (32% of 4,865)              | 141 (36% of 393) RIS<br>105 (17% of 622) QUE<br>147 (30% of 493) OLA |                                                                                                                                                | pneumonia on April 8, 2019                                          |
| This editorial                                                                                        | 2,077 (30% of 6,983)              | 181 (36% of 506) RIS<br>189 (22% of 848) QUE<br>221 (32% of 685) OLA |                                                                                                                                                | broad pneumonia <sup>d</sup> on July 17, 2019                       |

ADRs, adverse drug reactions; CI, 95% confidence interval; LAI: long-acting injections; OLA, olanzapine; OR, odds ratio; QUE, quetiapine; RR, risk ratio; RIS, risperidone; US, United States.

<sup>a</sup>Compared to controls.

<sup>b</sup>Expected if the antipsychotic had followed the general reporting in the database with 0.9% of the reports relating to pneumonia.

<sup>c</sup>A standard statistical analysis for this data combining statistical shrinkage and Bayesian confidence intervals for the observed-to-expected ratio indicates a robust statistical association where the limits of the two-sided 95% confidence interval are [4.0,4.2] with a point estimate of 4.1 ( $p < 0.001$ ). Moreover, such association is observed in separate analyses for all adult age groups and across the Americas, Asia, Europe and Oceania, reducing the likelihood of being due to report artifacts or case duplication.

<sup>d</sup>By adding pneumonia, lower respiratory infection and aspiration.

Supplementary Table S2. Third finding: pneumonia may be an important cause of death in clozapine patients

| Author                        | Database                                                                      | Deaths                |                                                                  |
|-------------------------------|-------------------------------------------------------------------------------|-----------------------|------------------------------------------------------------------|
|                               |                                                                               | Pneumonia/total       | Other causes/total                                               |
| Walker et al. <sup>S8</sup>   | 1991-1993 US clozapine                                                        | 12 <sup>a</sup> /396  | 24/396 suicide<br>18/396 pulmonary embolism                      |
| Rohde et al. <sup>S9</sup>    | Danish registry first 2 m<br>3,262 initiations                                | 7/26 <sup>b</sup>     | 3/26 stroke                                                      |
| Ruan & de Leon <sup>S10</sup> | KY MH mortality <sup>c</sup><br>Inpatients (2002-18)<br>Outpatients (2008-18) | 1/700                 | 1/700 myocarditis                                                |
|                               |                                                                               | 1/500                 | no other deaths                                                  |
| This editorial                | Vigibase (1968 to 07/15/19)<br>>140,000 clozapine ADRs                        | 2,077 broad pneumonia | 1,449 sudden death & cardiac arrest<br>550 broad agranulocytosis |

ADRs, adverse drug reactions; m: month; KY MH: Kentucky mental health; US, United States.

<sup>a</sup>11 deaths from pneumonia and 1 death from pneumonitis and aspiration.

<sup>b</sup>2.1 deaths/1000 patients within 2 months of clozapine initiation.

<sup>c</sup>KY state MH facilities (inpatients) and an assisted living program for people with intellectual disabilities (outpatients).

Supplementary Table S3. Fatal outcomes of ADRs reported to VigiBase which are likely to be associated with clozapine.

| ADRs                                                                                       | Fatal Outcomes | Relative Lethality <sup>a</sup> | Reports | IC <sub>025</sub> <sup>b</sup> |
|--------------------------------------------------------------------------------------------|----------------|---------------------------------|---------|--------------------------------|
| <b>&gt;100 FATAL OUTCOMES IN ORDER; LIKELY<sup>c</sup> TO BE ASSOCIATED WITH CLOZAPINE</b> |                |                                 |         |                                |
| Pneumonia                                                                                  | 1,654          | 33%                             | 4,951   | 1.9                            |
| Cardiac arrest                                                                             | 849            | 84%                             | 1,014   | 1.1                            |
| Sudden death                                                                               | 619            | 100%                            | 619     | 3.1                            |
| Seizure                                                                                    | 283            | 6%                              | 4,518   | 1.8                            |
| Lower respiratory tract infection                                                          | 281            | 14%                             | 1,974   | 3.1                            |
| Constipation                                                                               | 280            | 11%                             | 2,539   | 0.9                            |
| Cardiac failure                                                                            | 271            | 41%                             | 659     | 1.0                            |
| Aspiration                                                                                 | 256            | 69%                             | 373     | 3.0                            |
| Agranulocytosis                                                                            | 213            | 4%                              | 4,798   | 4.4                            |
| Choking                                                                                    | 191            | 66%                             | 290     | 1.8                            |
| Arrhythmia                                                                                 | 188            | 40%                             | 469     | 0.5                            |
| Myocarditis                                                                                | 170            | 6%                              | 3,048   | 5.9                            |
| Hypotension                                                                                | 166            | 8%                              | 2,212   | 0.5                            |
| WBC decrease                                                                               | 147            | 4%                              | 6,898   | 3.7                            |
| Neutropenia                                                                                | 142            | 1%                              | 10,895  | 3.7                            |
| Leukopenia                                                                                 | 141            | 1%                              | 10,549  | 4.0                            |
| Tachycardia                                                                                | 135            | 2%                              | 6,518   | 2.8                            |
| Cardiomyopathy                                                                             | 131            | 12%                             | 1,132   | 3.7                            |
| Syncope                                                                                    | 116            | 11%                             | 1,041   | 0.2                            |
| <b>OTHER OVERLAPPING<sup>d</sup> ADRS ASSOCIATED WITH FATAL OUTCOMES</b>                   |                |                                 |         |                                |
| Neutrophil count decrease                                                                  | 90             | 1%                              | 8,998   | 5.1                            |
| Megacolon                                                                                  | 56             | 51%                             | 109     | 3.8                            |
| Paralytic ileus                                                                            | 51             | 16%                             | 323     | 3.5                            |
| Granulocytopenia                                                                           | 46             | 1%                              | 5,741   | 5.4                            |
| Orthostatic hypotension                                                                    | 32             | 3%                              | 1,090   | 2.8                            |
| Generalized tonic-clonic seizures                                                          | 27             | 1%                              | 1,809   | 3.0                            |

ADRs: adverse drug reactions; IC: information component; IC<sub>025</sub>: lower 97.5% confidence intervals of the IC; WBC: white blood cell count.

<sup>a</sup>Relative lethality = fatal outcomes/reports.

<sup>b</sup>A Bayesian confidence propagation neural network provides a statistical indicator called IC, which is used to filter out combinations of particular drugs and ADRs that are present in the database more frequently than expected, according to all reports for the particular drug and ADRs, and the total number of reports in the database. An IC of 0 results from drug-ADR combinations for which the number of observed cases is the same as that which might be expected from the overall reporting in the data set. Positive values represent combinations reported more frequently and negative values more infrequently than expected. The 97.5% confidence intervals of the ICs are calculated. An IC<sub>025</sub>>0 indicates that the lowest value of the 97.5% confidence interval of the IC is higher than expected, based on the background.

<sup>c</sup>In the 5,352 categories of ADRs used for the 144,020 clozapine reports, another 16 ADRs had >100 fatal outcomes; a list is available from the first author. We consider that these 16 ADRs are not likely to be associated with clozapine, since there is no clear pharmacological mechanism and many of them have low IC<sub>025</sub>. Two examples are: myocardial infarct with 1,135 fatal outcomes (69% of 1,638 reports; IC<sub>025</sub>=0.6) and cerebrovascular accident with 174 fatal outcomes (35% of 495 reports; IC<sub>025</sub>=-0.7).

<sup>d</sup>These categories overlap with those of the upper panel and ignoring them may contribute to fewer fatal outcomes for that clozapine ADR.

Supplementary Table S4. Pneumonia cases and sudden cardiac events reported to VigiBase and associated with clozapine and 3 antipsychotics

| ADRs                                           | Clozapine                | Risperidone              | Quetiapine               | Olanzapine               |
|------------------------------------------------|--------------------------|--------------------------|--------------------------|--------------------------|
| <b>Grouped ADRs</b>                            |                          |                          |                          |                          |
|                                                | Fatal outcomes/cases (%) | Fatal outcomes/cases (%) | Fatal outcomes/cases (%) | Fatal outcomes/cases (%) |
| Broad pneumonia <sup>a</sup>                   | 2,077/6,983 (30%)        | 181/506 (36%)            | 189/848 (22%)            | 221/685 (32%)            |
| Sudden deaths and cardiac arrests <sup>b</sup> | 1,449/1,614 (90%)        | 486/591 (82%)            | 871/1,014 (86%)          | 609/726 (84%)            |
| Broad arrhythmia <sup>c</sup>                  | 319/6,927 (5%)           | 91/1,466 (6%)            | 131/1,515 (9%)           | 125/1,216(10%)           |
| <b>ADRs included in above groups</b>           |                          |                          |                          |                          |
| Pneumonia                                      | 1,654/4,951 (33%)        | 153/435 (35%)            | 124/692 (18%)            | 165/572 (29%)            |
| Lower respiratory tract infection              | 281/1,974 (14%)          | 3/21 (14%)               | 1/35 (3%)                | 4/27 (15%)               |
| Aspiration                                     | 256/373 (69%)            | 29/59 (49%)              | 67/134 (50%)             | 56/100 (56%)             |
| Cardiac arrest                                 | 849/1,014 (84%)          | 306/411 (74%)            | 769/912 (84%)            | 404/521 (76%)            |
| Sudden deaths                                  | 619/619 (100%)           | 186/186 (100%)           | 105/105 (100%)           | 212/212 (100%)           |
| Arrhythmia                                     | 188/469 (40%)            | 56/217 (26%)             | 72/274 (26%)             | 78/222 (35%)             |
| Tachycardia                                    | 135/6,518 (2%)           | 37/1,262 (3%)            | 64/1,258 (5%)            | 47/1,008 (5%)            |

ADRs: adverse drug reactions.

<sup>a</sup>By adding pneumonia, lower respiratory infection and aspiration.

<sup>b</sup>By adding cardiac arrest and sudden death.

<sup>c</sup>By adding tachycardia and arrhythmias.

Supplementary Table S5. Total ADR reports of clozapine, risperidone, quetiapine and olanzapine in VigiBase

| ADRs                     | Clozapine | Risperidone | Quetiapine | Olanzapine |
|--------------------------|-----------|-------------|------------|------------|
|                          | N         | N           | N          | N          |
| Total number of reports  | 144,020   | 100,283     | 80,503     | 63,827     |
| Number of different ADRs | 5,352     | 4,417       | 5,479      | 4,766      |

ADR: adverse drug reaction.

## Supplementary References

- S1. Kuo CJ, Yang SY, Liao YT, Chen WJ, Lee WC, Shau WY, Chang YT, Tsai SY, Chen CC. Second-generation antipsychotic medications and risk of pneumonia in schizophrenia. *Schizophr Bull.* 2013;39:648-657.
- S2. Yang SY, Liao YT, Liu HC, Chen WJ, Chen CC, Kuo CJ. Antipsychotic drugs, mood stabilizers, and risk of pneumonia in bipolar disorder: a nationwide case-control study. *J Clin Psychiatry.* 2013;74:e79-e86.
- S3. Hung GC, Liu HC, Yang SY, Pan CH, Liao YT, Chen CC, Kuo CJ. Antipsychotic reexposure and recurrent pneumonia in schizophrenia: a nested case-control study. *J Clin Psychiatry.* 2016;77:60-66.
- S4. Kuo KM, Talley PC, Huang CH, Cheng LC. Predicting hospital-acquired pneumonia among schizophrenic patients: a machine learning approach. *BMC Med Inform Decis Mak.* 2019;19:42.
- S5. Wu CS, Chen TY, Tsai SY, Chen CC, Kuo CJ. Estimating the risk of pneumonia in patients with schizophrenia newly receiving clozapine: a nationwide cohort study. *J Clin Psychopharmacol.* 2019;39:297-304.
- S6. Stoecker ZR, George WT, O'Brien JB, Jancik J, Colon E, Rasimas JJ. Clozapine usage increases the incidence of pneumonia compared with risperidone and the general population: a retrospective comparison of clozapine, risperidone, and the general population in a single hospital over 25 months. *Int Clin Psychopharmacol.* 2017;32:155-160.
- S7. Taylor DM, Douglas-Hall P, Olofinjana B, Whiskey E, Thomas A. Reasons for discontinuing clozapine: matched, case-control comparison with risperidone long-acting injection. *Br. J. Psychiatry.* 2009;194:165-167.
- S8. Walker AM, Lanza LL, Arellano F, Rothman KJ. Mortality in current and former users of clozapine. *Epidemiology.* 1997;8:671-677.



- S9. Rohde C, Polcwiartek C, Kragholm K, Ebdrup BH, Siskind D, Nielsen J: Adverse cardiac events in out-patients initiating clozapine treatment: a nationwide register-based study. *Acta Psychiatr. Scand.* 2018;137:47-53.
- S10. Ruan CJ, de Leon J. Thirty years of both ignorance and clinical experience suggest that clozapine intoxication during co-occurring infections and inflammation may have higher morbidity and mortality than is currently believed. *Psychosomatics.* 2019;60:221-222.
